# Supplementary material for: Ring-locking strategy facilitating determination of absolute optical purity of 2-amino-1-butanol by reverse-phase high-performance liquid chromatography
Source: Royal Society of Chemistry journal article supplement (doi:10.1039/c7ra09362d), 2017-01-01
Supplement: c7ra09362d1.pdf [file c7ra09362d1.pdf]

Electronic Supplementary Information (ESI)

**Ring-locking strategy facilitating determination of absolute optical  
purity of 2-amino-1-butanol by reverse-phase high-performance liquid  
chromatography**

Bo Li #, Jie Zhang #, Bei-Bei Yang, Li Li \*, Xiao-Xiao Yang \*

Beijing Key Laboratory of Active Substances Discovery and Druggability Evaluation,  
Institute of Materia Medica, Chinese Academy of Medical Sciences & Peking Union  
Medical College, Beijing 100050, P.R. China.

# B. Li and J. Zhang contributed equally to this work.

\* Corresponding authors: [annaleelin@imm.ac.cn](mailto:annaleelin@imm.ac.cn) (L. Li.), Tel./Fax: +86-10-63165247;  
[yangxx@imm.ac.cn](mailto:yangxx@imm.ac.cn) (X. X. Yang), Tel.: +86-10-63165251.

## The List of Contents

| No. | Content                                                                                                                                | Page |
|-----|----------------------------------------------------------------------------------------------------------------------------------------|------|
| 1   | <b>Fig. S1</b> The optimized nineteen conformers (content > 1%) of <b>3</b> and equilibrium population of the conformers in methanol   | S3   |
| 2   | <b>Fig. S2</b> The optimized ten conformers (content > 1%) of <b>5a</b> and equilibrium population of the conformers in methanol       | S4   |
| 3   | <b>Fig. S3</b> The optimized seventeen conformers (content > 1%) of <b>5b</b> and equilibrium population of the conformers in methanol | S5   |
| 4   | <b>Fig. S4</b> <sup>1</sup> H and <sup>13</sup> C NMR spectra of <b>3</b>                                                              | S6   |
| 5   | <b>Fig. S5</b> ESI-HRMS spectrum of <b>3</b>                                                                                           | S7   |
| 6   | <b>Fig. S6</b> <sup>1</sup> H and <sup>13</sup> C NMR spectra of <b>4a</b>                                                             | S8   |
| 7   | <b>Fig. S7</b> ESI-HRMS spectrum of <b>4a</b>                                                                                          | S9   |
| 8   | <b>Fig. S8</b> <sup>1</sup> H and <sup>13</sup> C NMR spectra of <b>4b</b>                                                             | S10  |
| 9   | <b>Fig. S9</b> ESI-HRMS spectrum of <b>4b</b>                                                                                          | S11  |
| 10  | <b>Fig. S10</b> <sup>1</sup> H and <sup>13</sup> C NMR spectra of <b>5a</b>                                                            | S12  |
| 11  | <b>Fig. S11</b> ESI-HRMS spectrum of <b>5a</b>                                                                                         | S13  |
| 12  | <b>Fig. S12</b> <sup>1</sup> H and <sup>13</sup> C NMR spectra of <b>5b</b>                                                            | S14  |
| 13  | <b>Fig. S13</b> ESI-HRMS spectrum of <b>5b</b>                                                                                         | S15  |

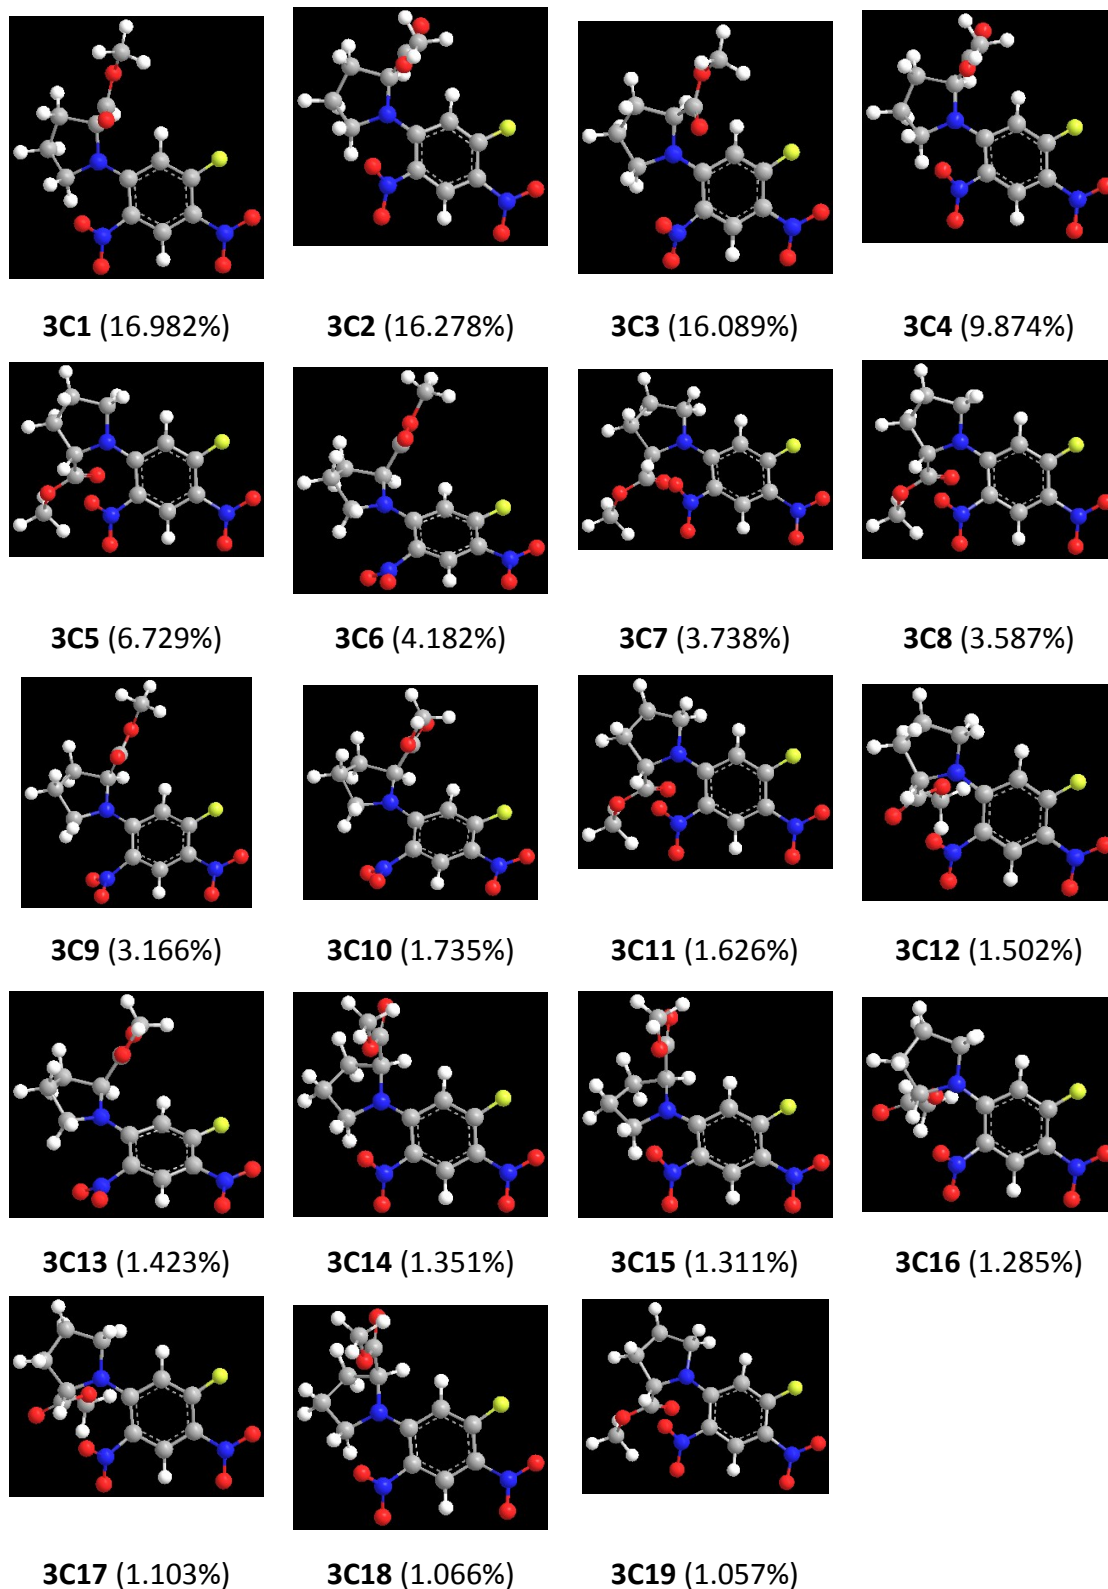

**Fig. S1** The optimized nineteen conformers (content > 1%) of **3** and equilibrium population of the conformers.

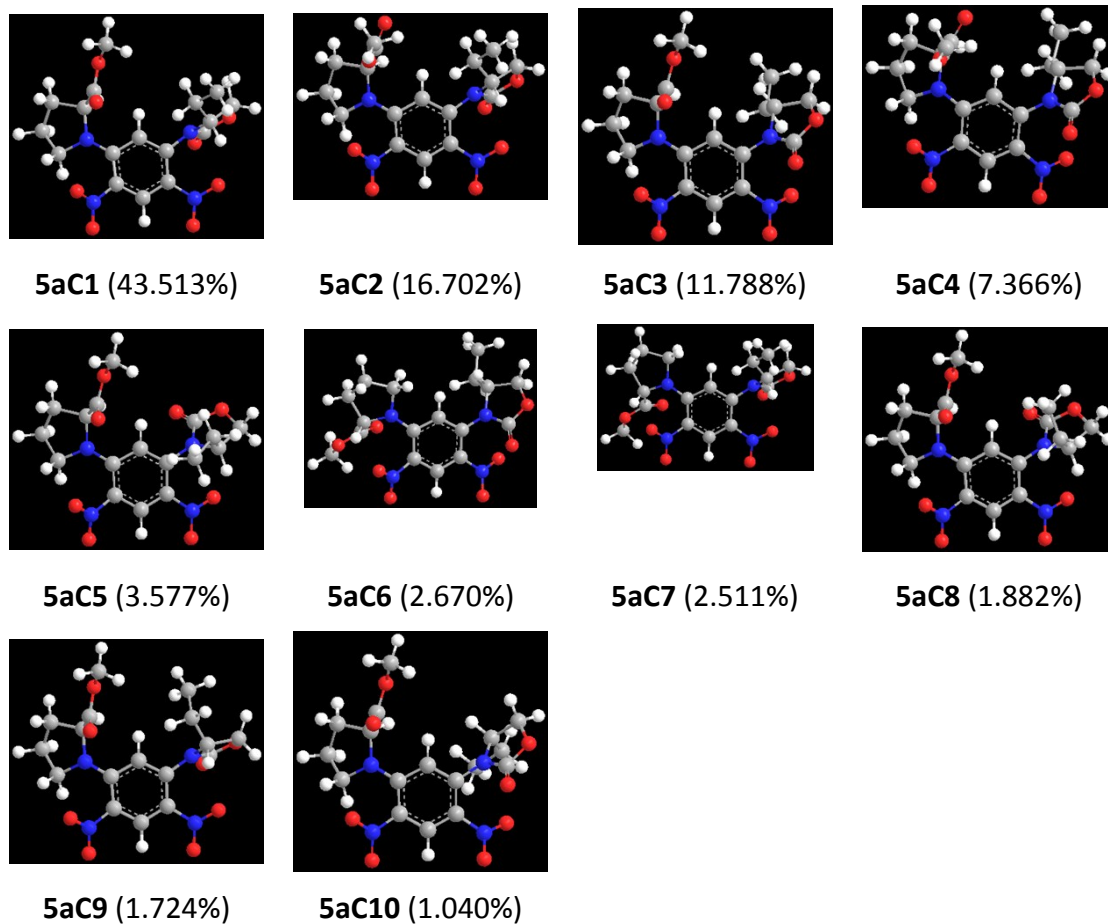

**Fig. S2** The optimized ten conformers (content > 1%) of **5a** and equilibrium population of the conformers.

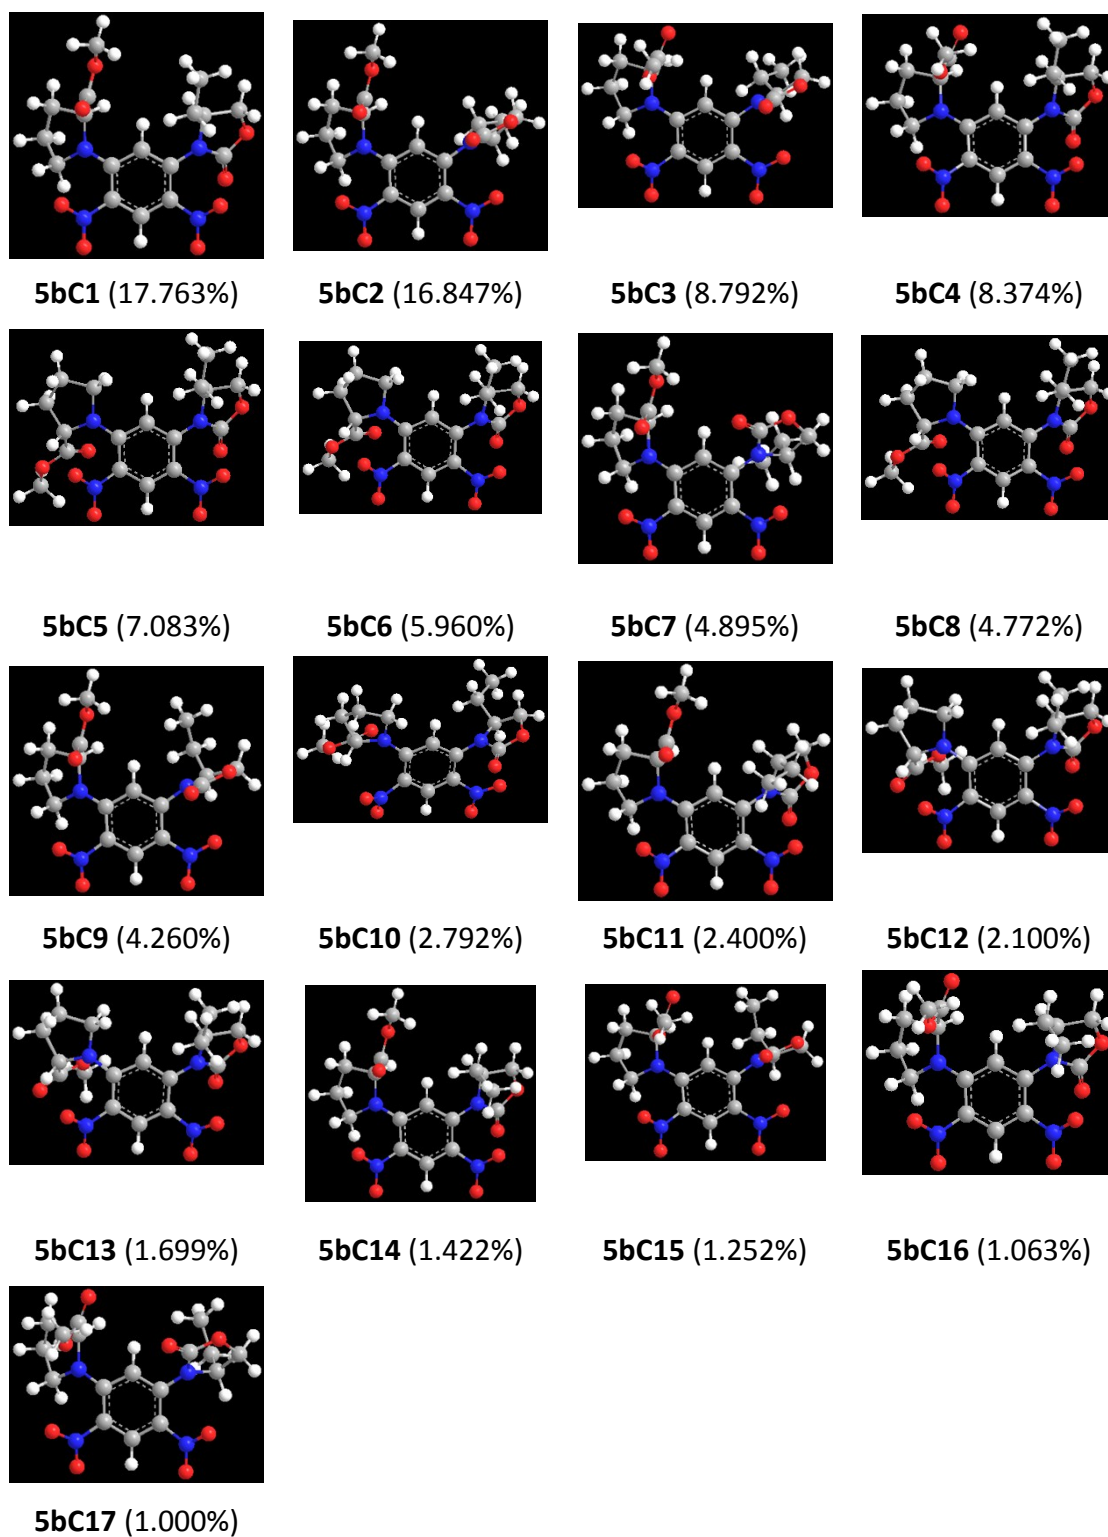

**Fig. S3** The optimized seventeen conformers (content > 1%) of **5b** and equilibrium population of the conformers.

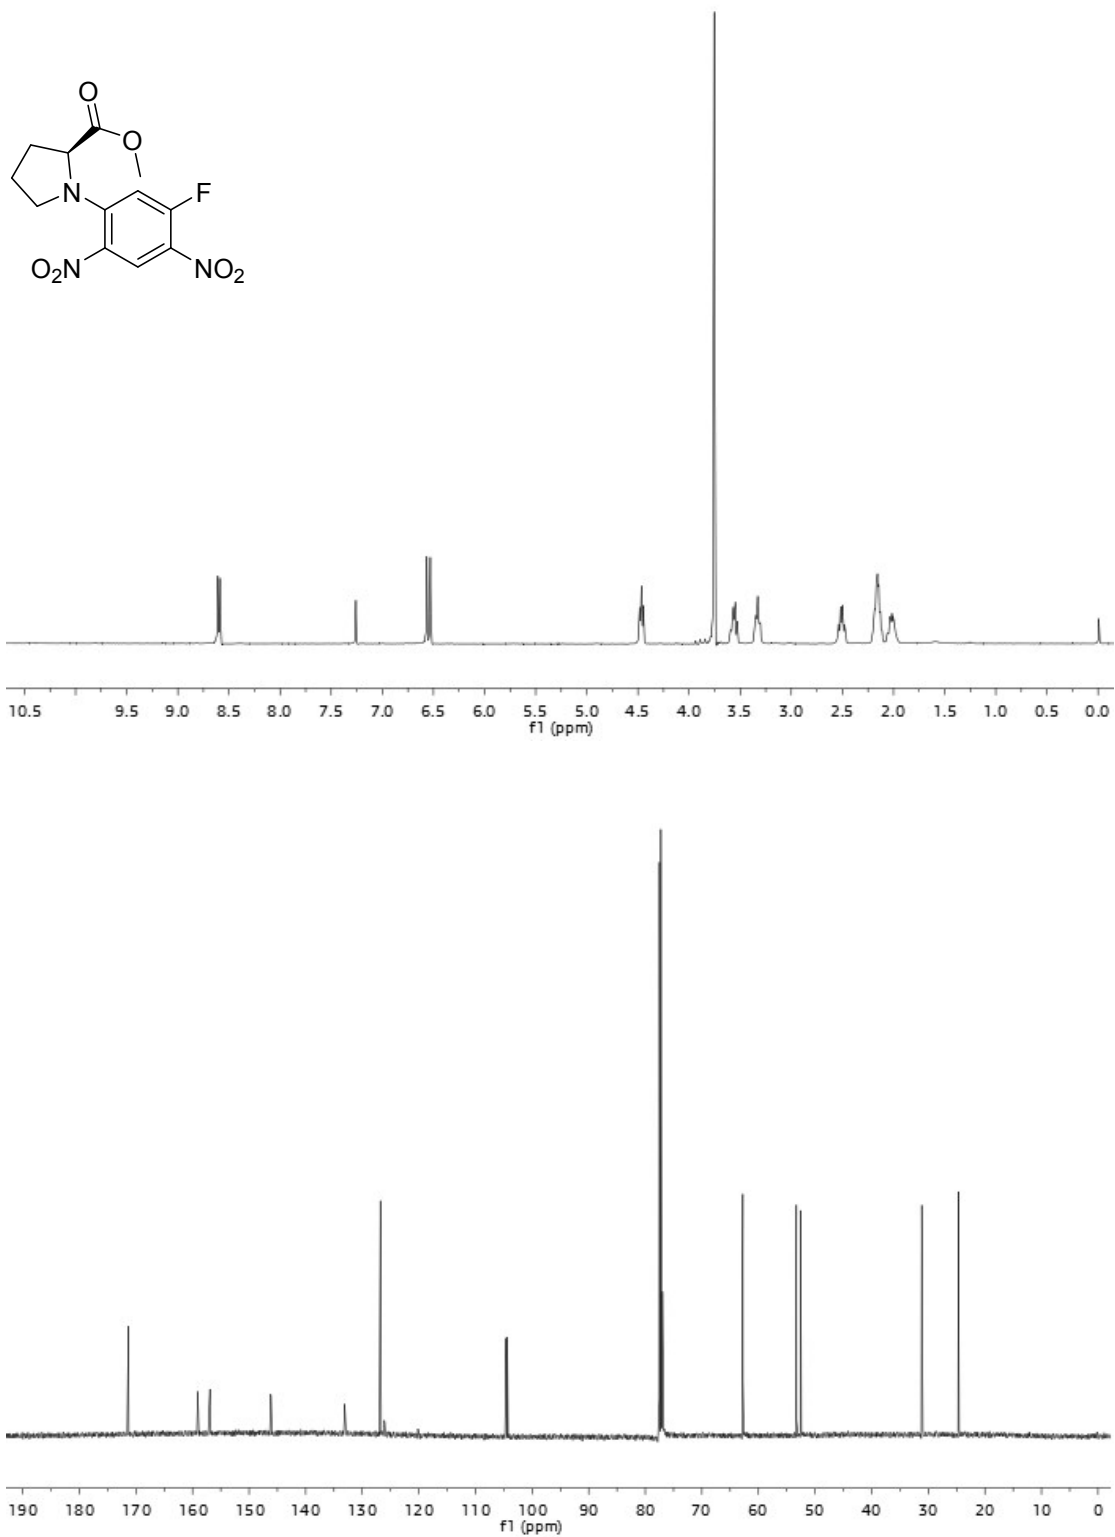

**Fig. S4**  $^1\text{H}$  and  $^{13}\text{C}$  NMR spectra of **3**.

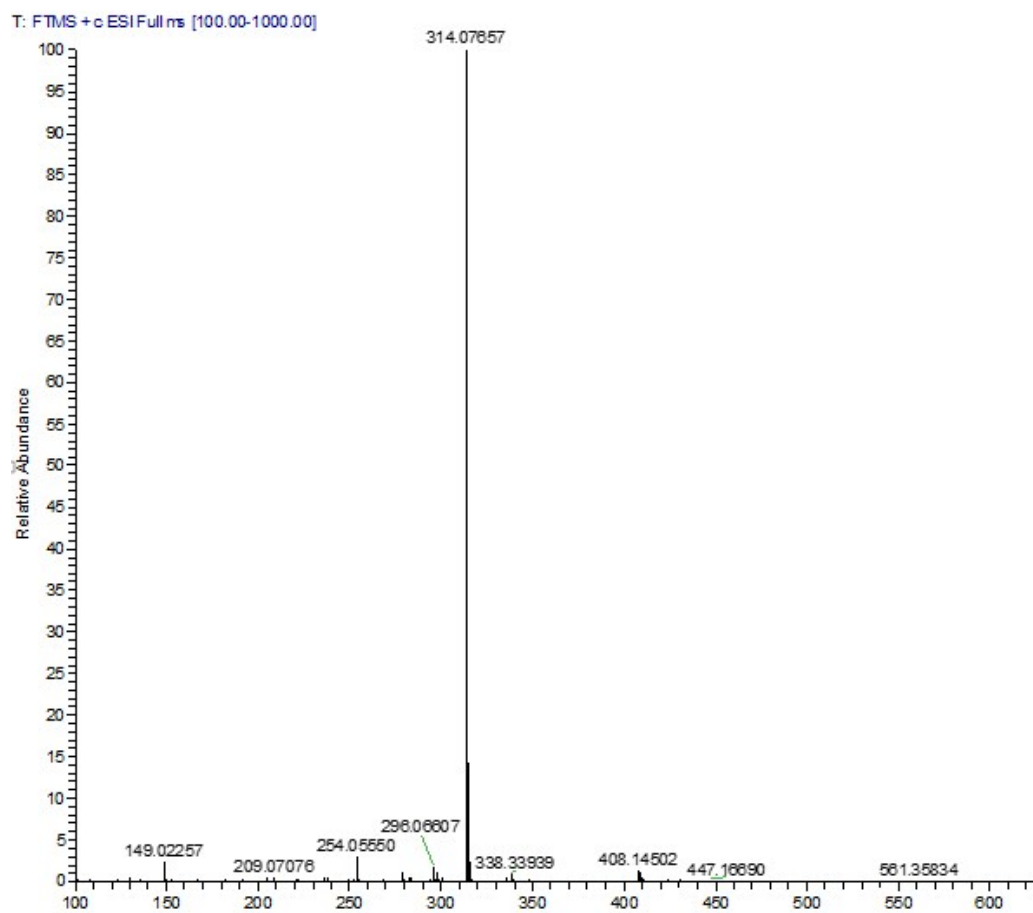

Fig. S5 ESI-HRMS spectrum of **3**.

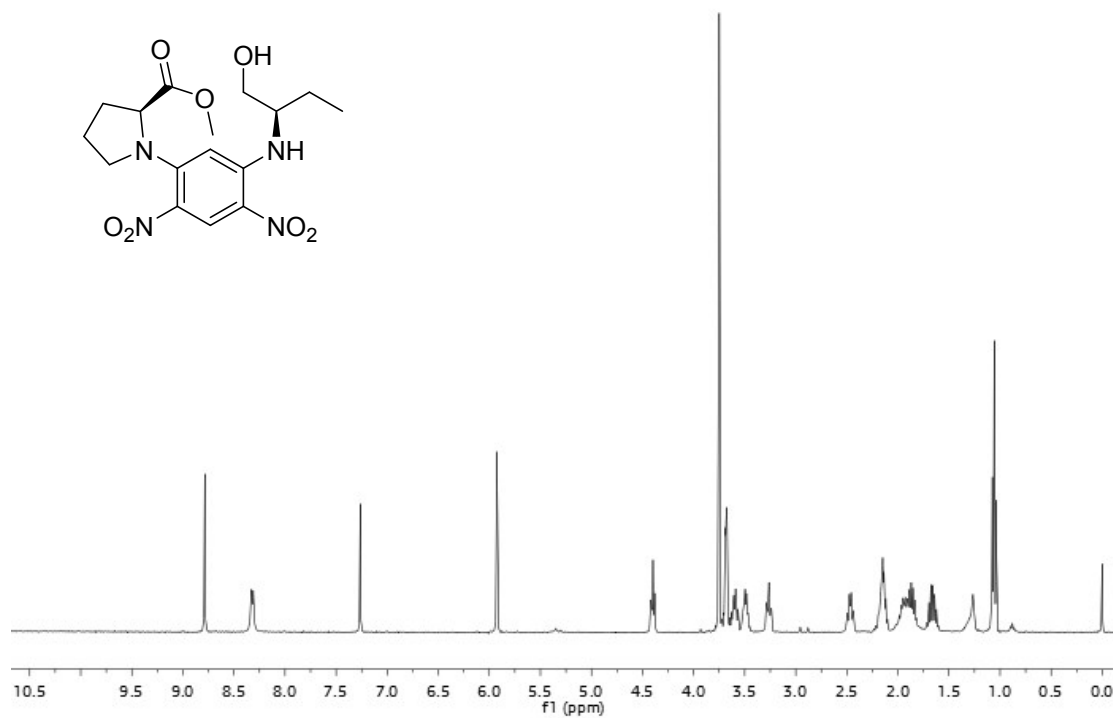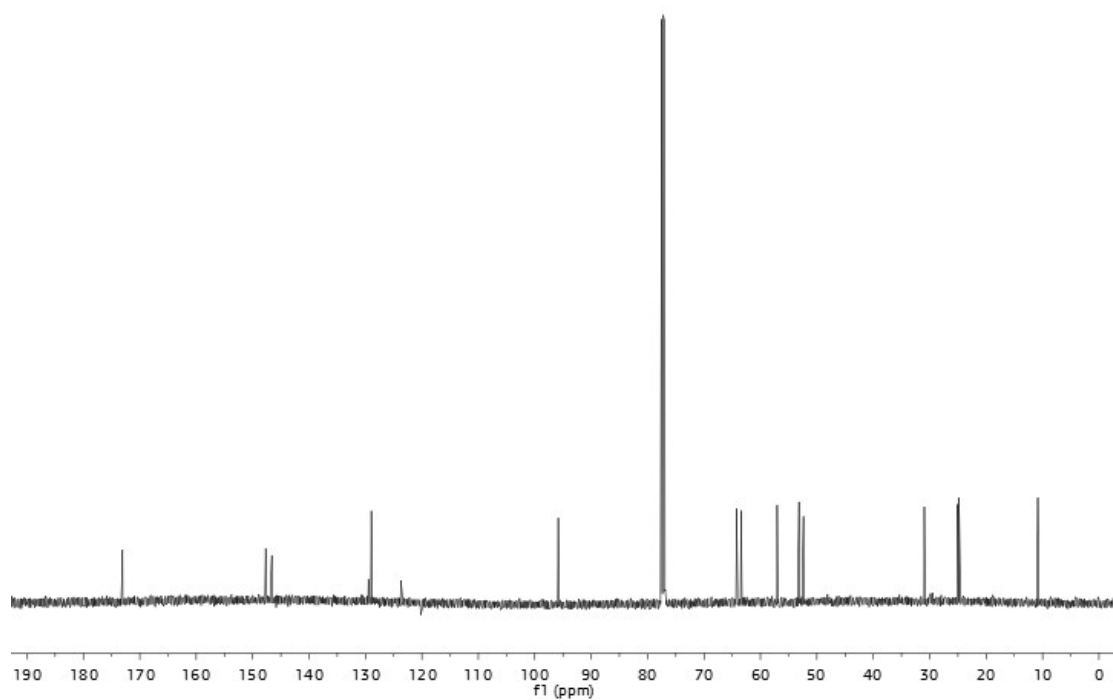

Fig. S6 <sup>1</sup>H and <sup>13</sup>C NMR spectra of 4a.



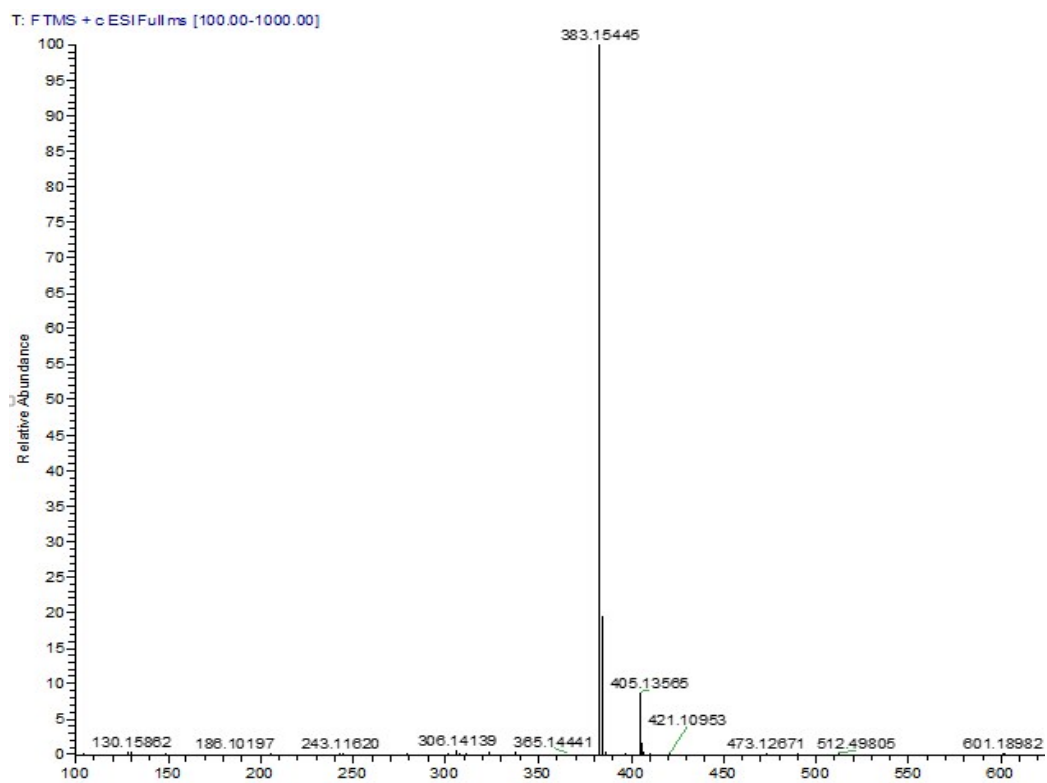

**Fig. S7** ESI-HRMS spectrum of **4a**.

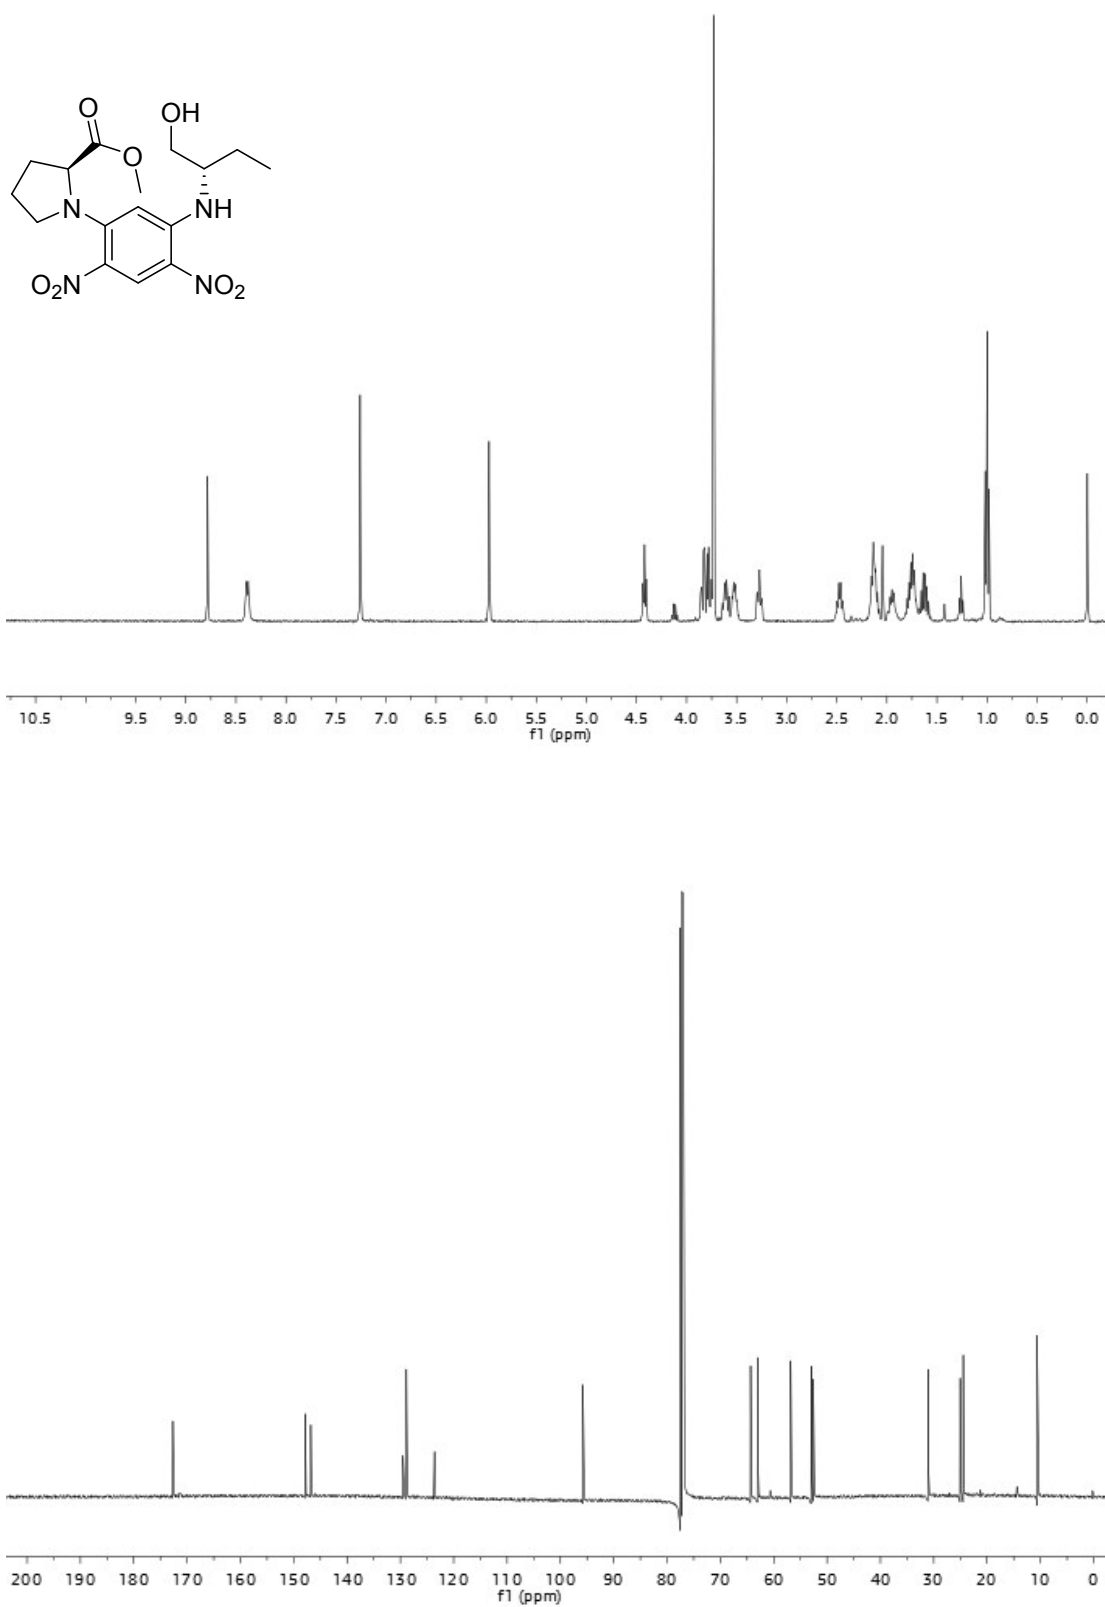

**Fig. S8**  $^1\text{H}$  and  $^{13}\text{C}$  NMR spectra of **4b**.

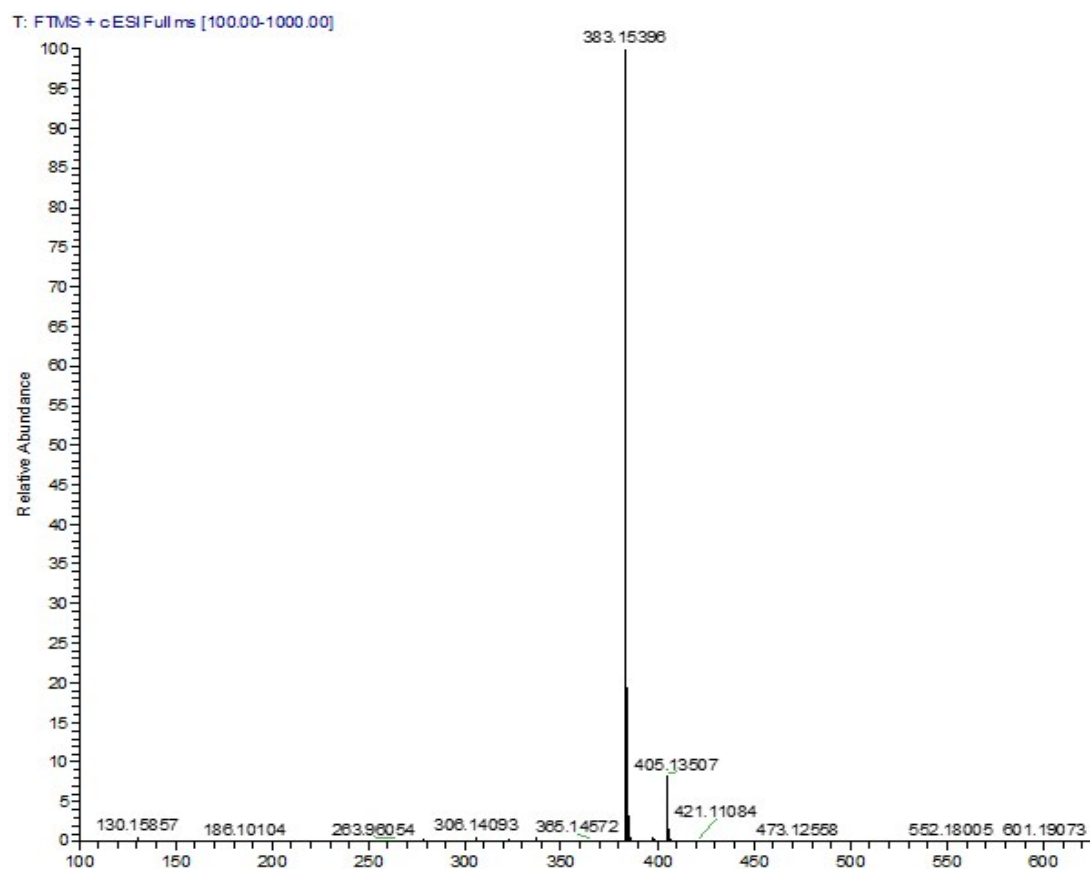

Fig. S9 ESI-HRMS spectrum of **4b**.

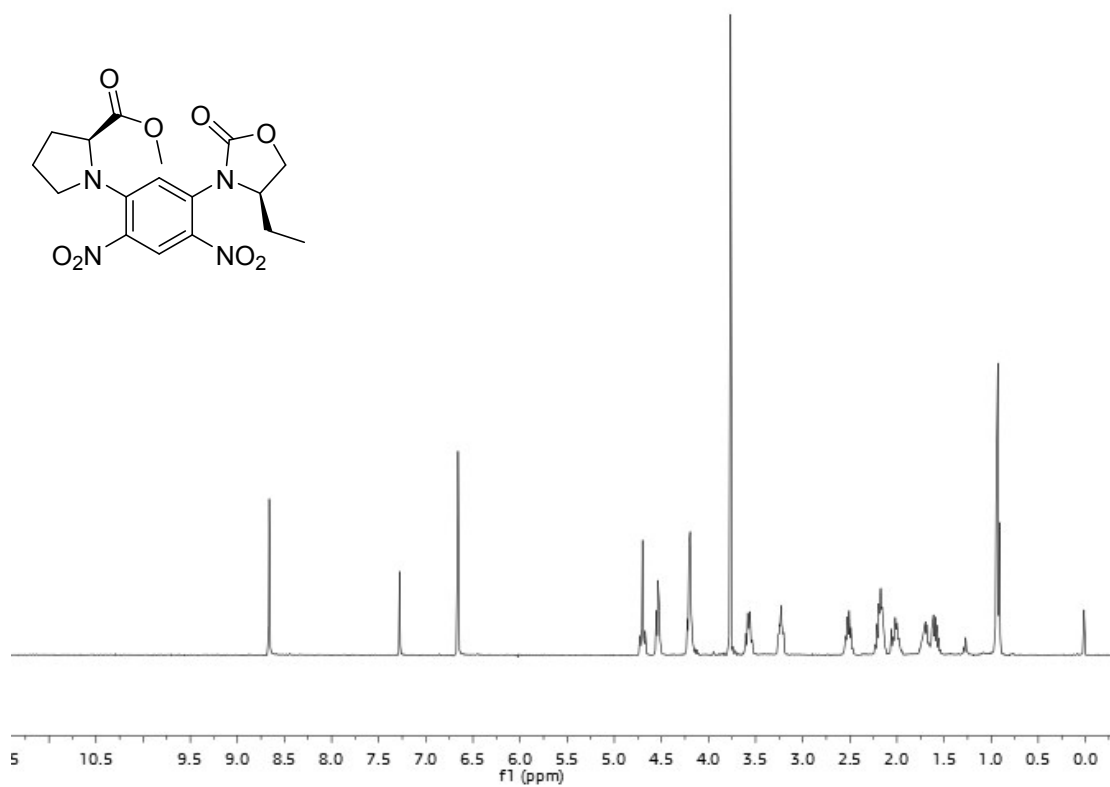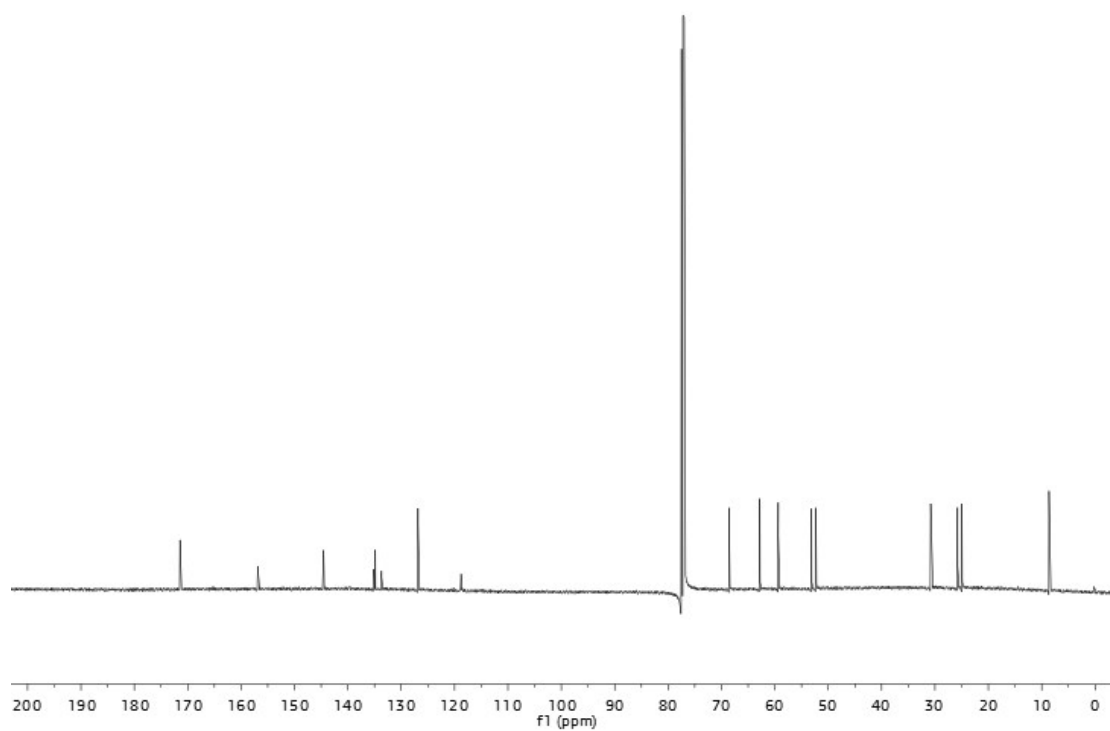

**Fig. S10**  $^1\text{H}$  and  $^{13}\text{C}$  NMR spectra of **5a**.

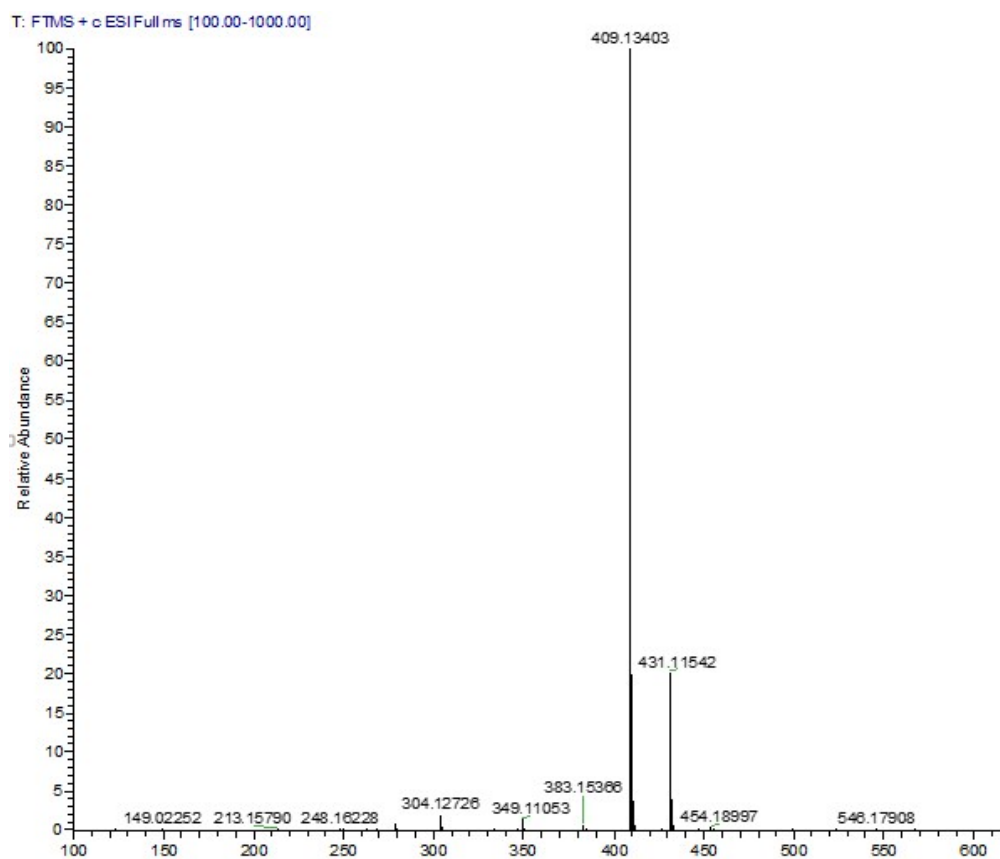

**Fig. S11** ESI-HRMS spectrum of **5a**.

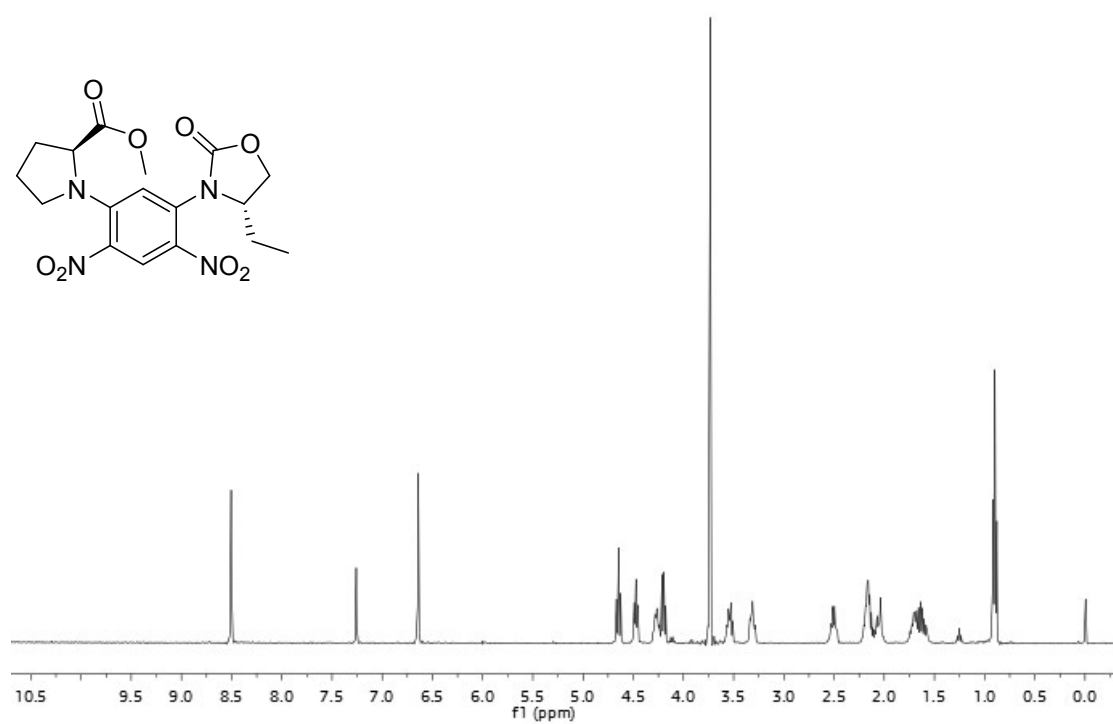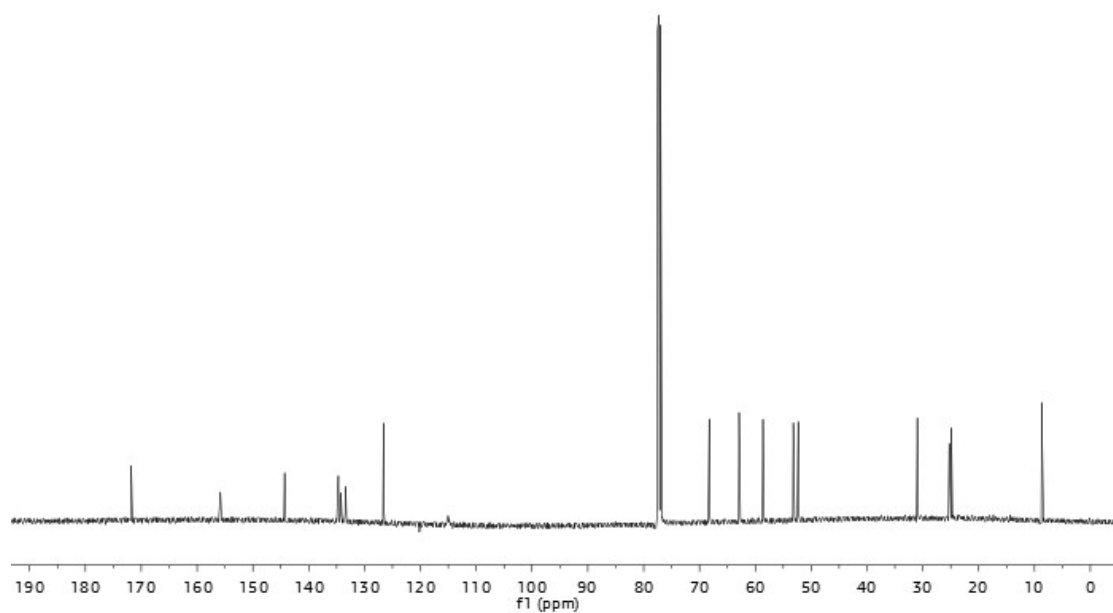

**Fig. S12** <sup>1</sup>H and <sup>13</sup>C NMR spectra of **5b**.

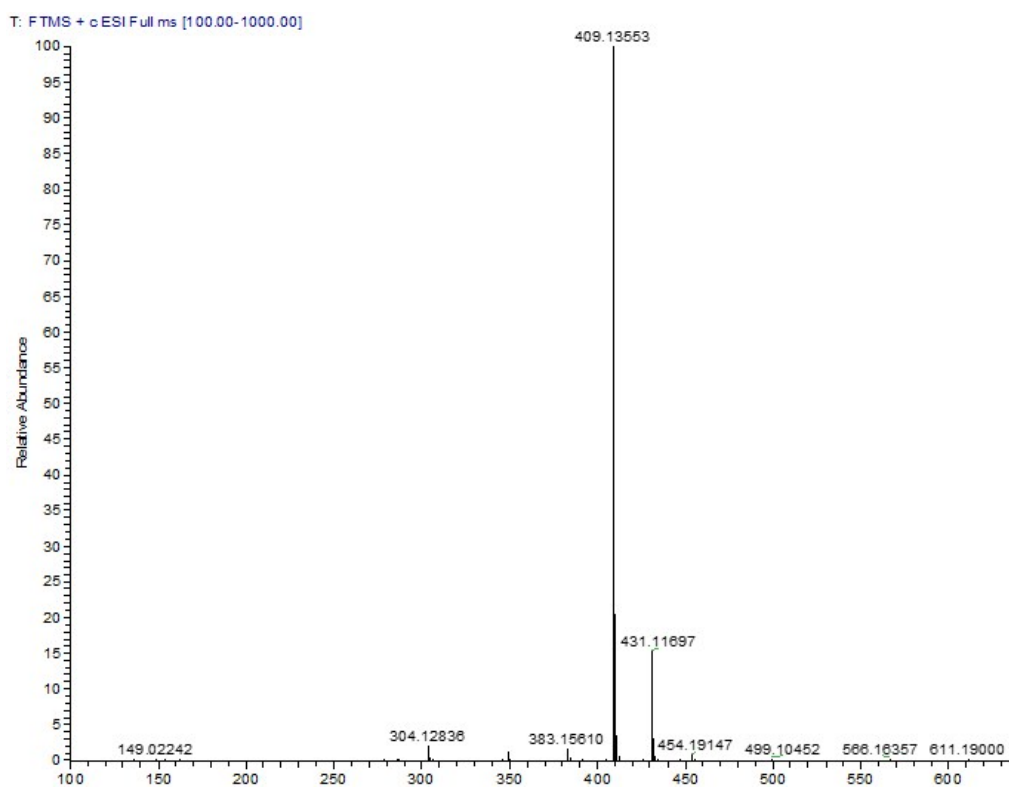

**Fig. S13** ESI-HRMS spectrum of **5b**.
